# Supplementary material for: The orientation of the C-terminal domain of the Saccharomyces cerevisiae Rap1 protein is determined by its binding to DNA
Source: PubMed Central journal article supplement — Nucleic Acids Res. 2011 Dec 1;40(7):3197–207. doi: 10.1093/nar/gkr1166 (PMC3326314; doi:10.1093/nar/gkr1166), 2011-12-01
Supplement: supp_gkr1166_nar-01705-r-2011-File004.pdf [file supp_gkr1166_nar-01705-r-2011-File004.pdf]

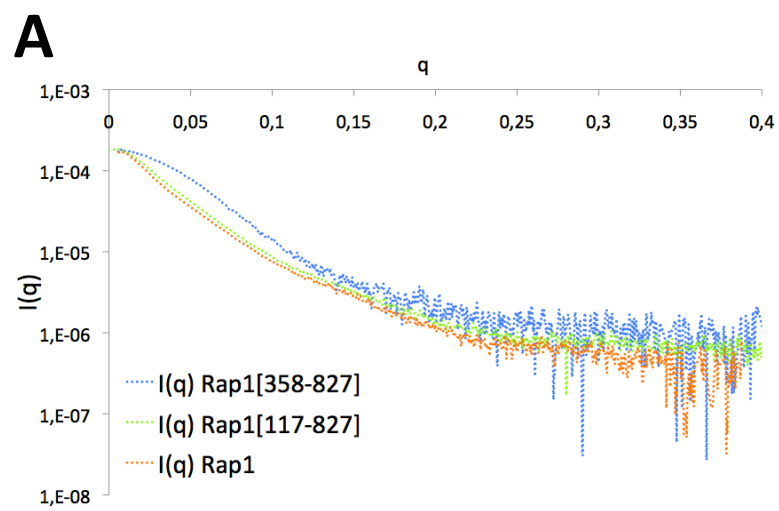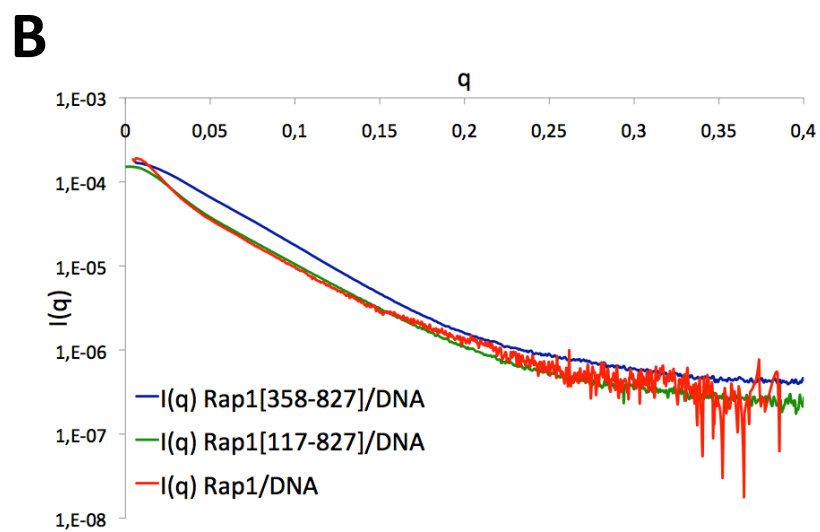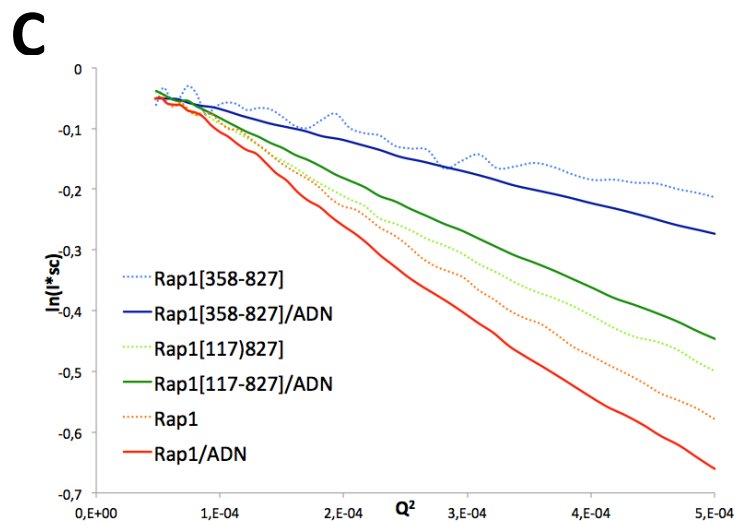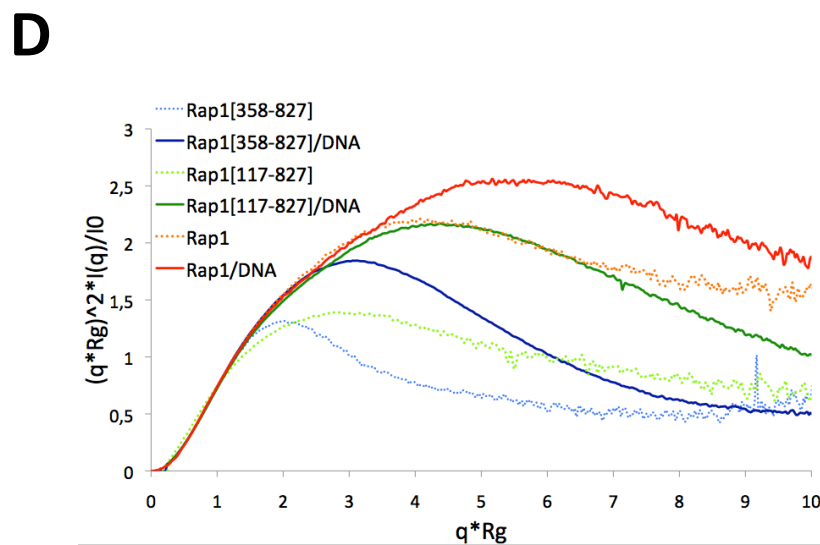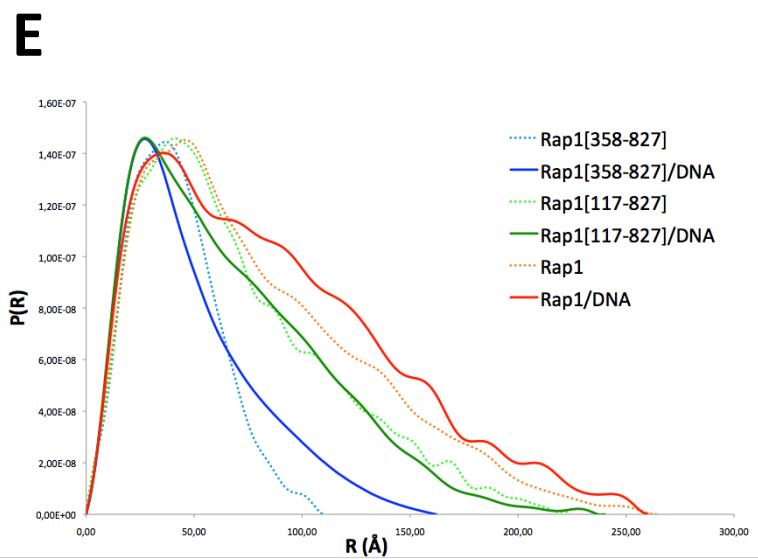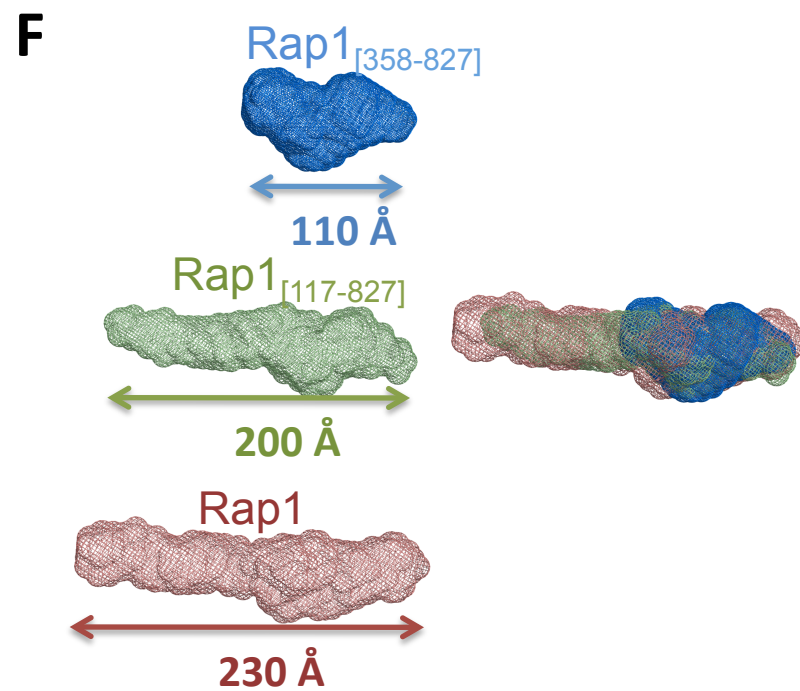

Figure S1: SAXS analysis

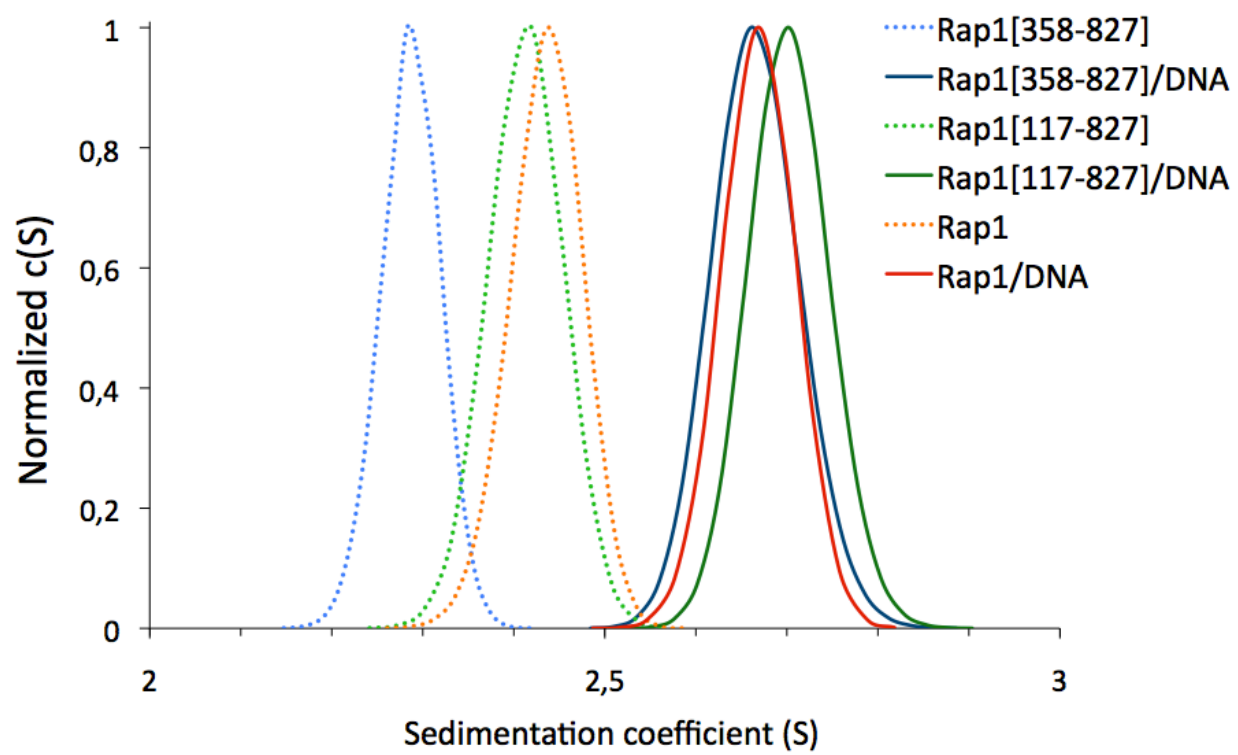

Figure S2 : Analytical Ultracentrifugation Sedimentation

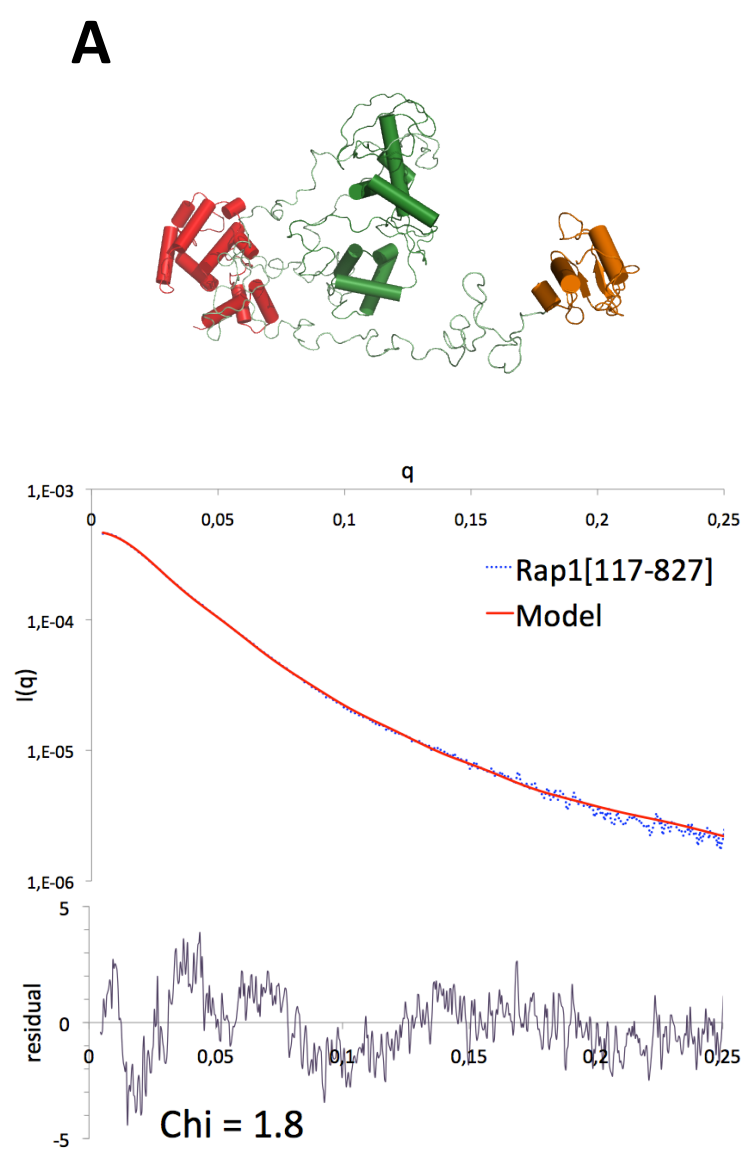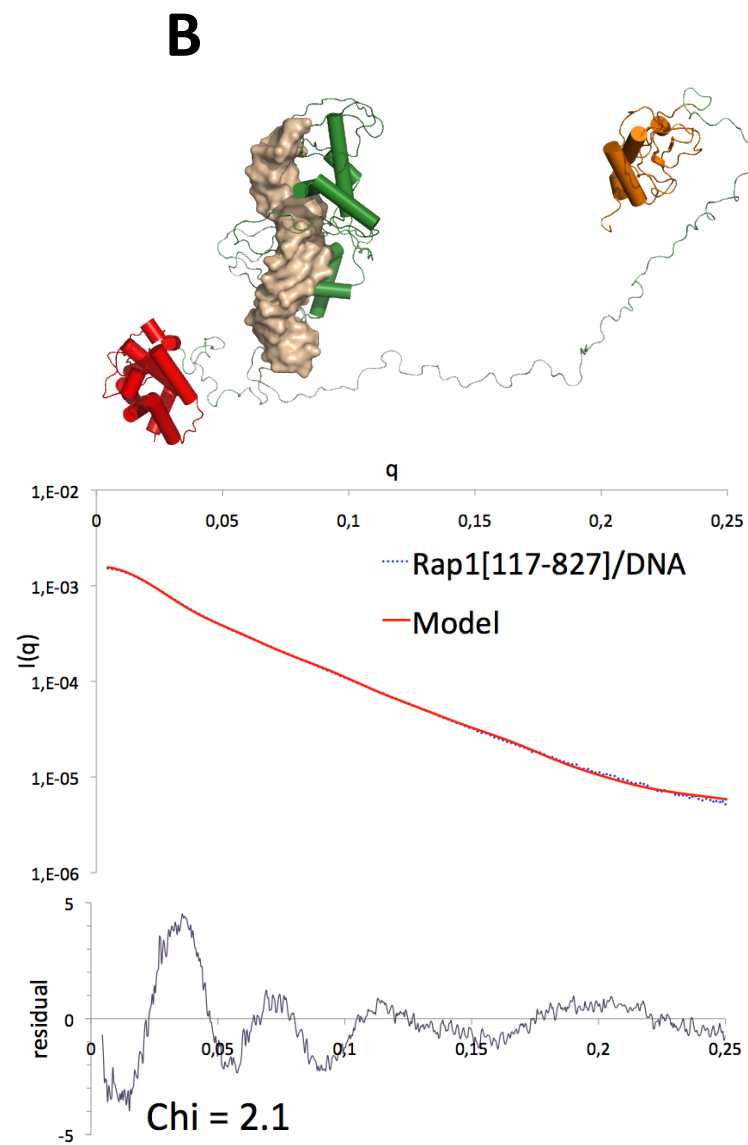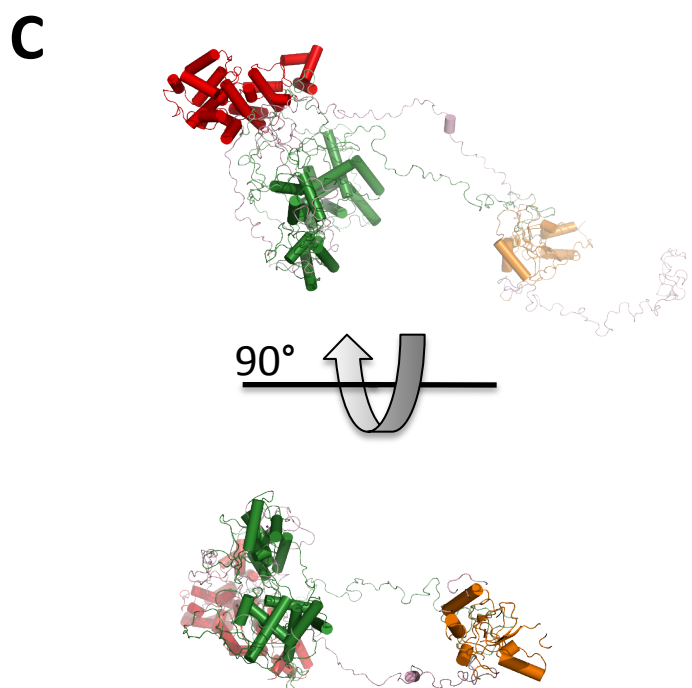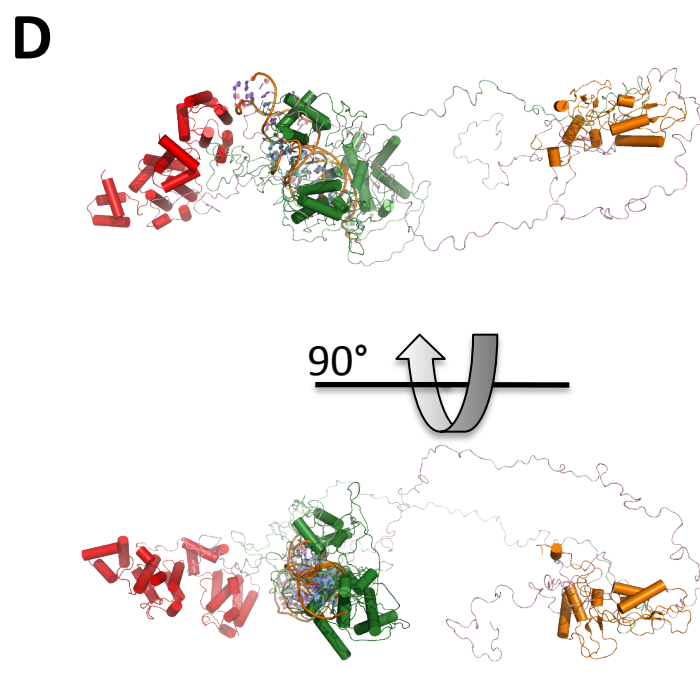

Figure S3: SAXS analysis of intermediate construct Rap1<sub>[117-827]</sub>

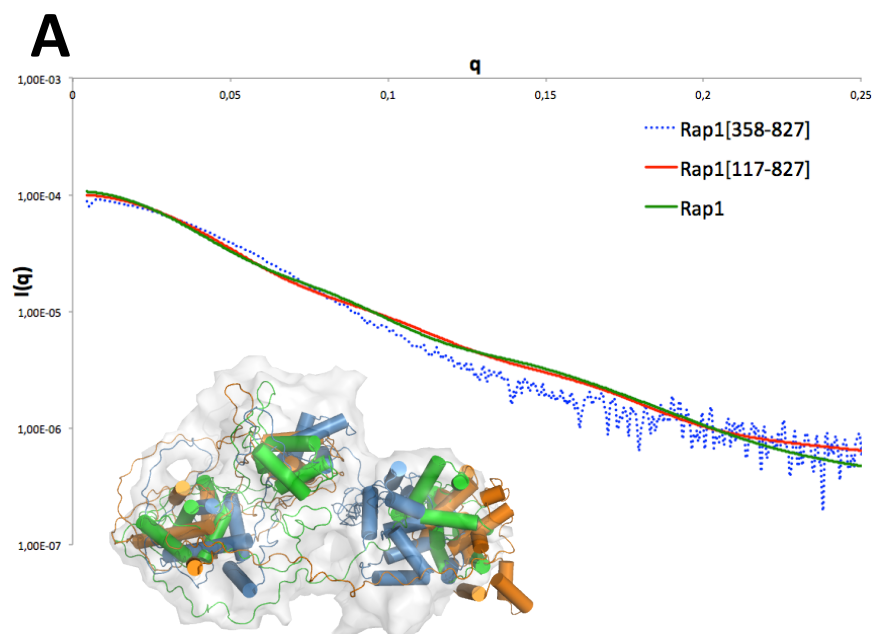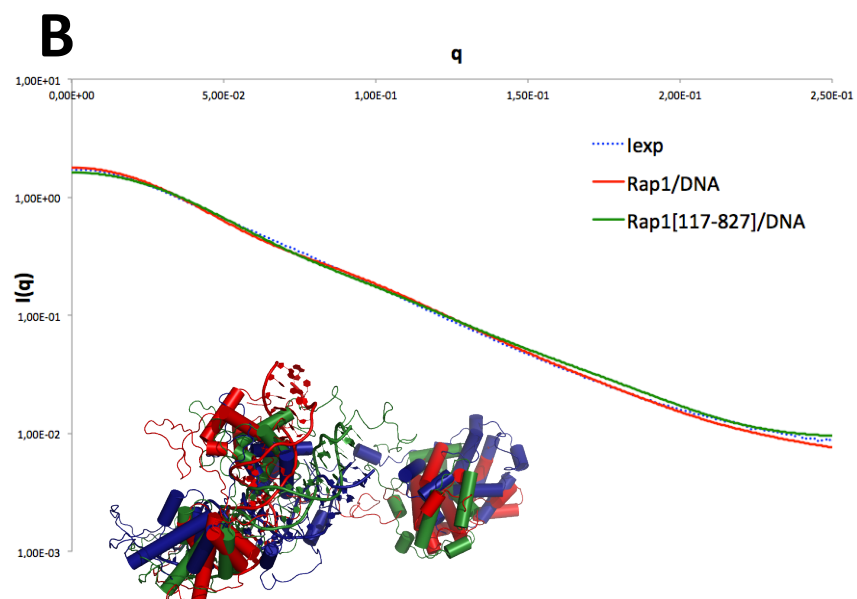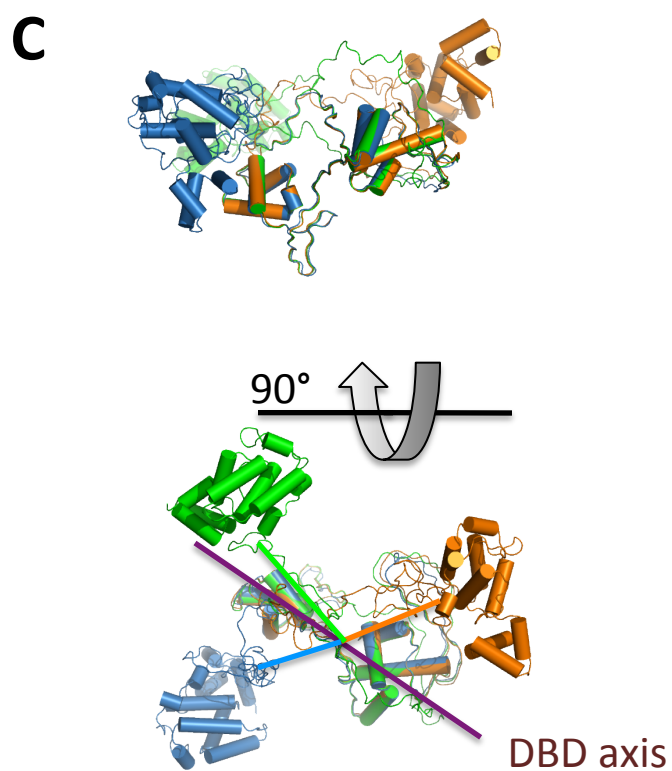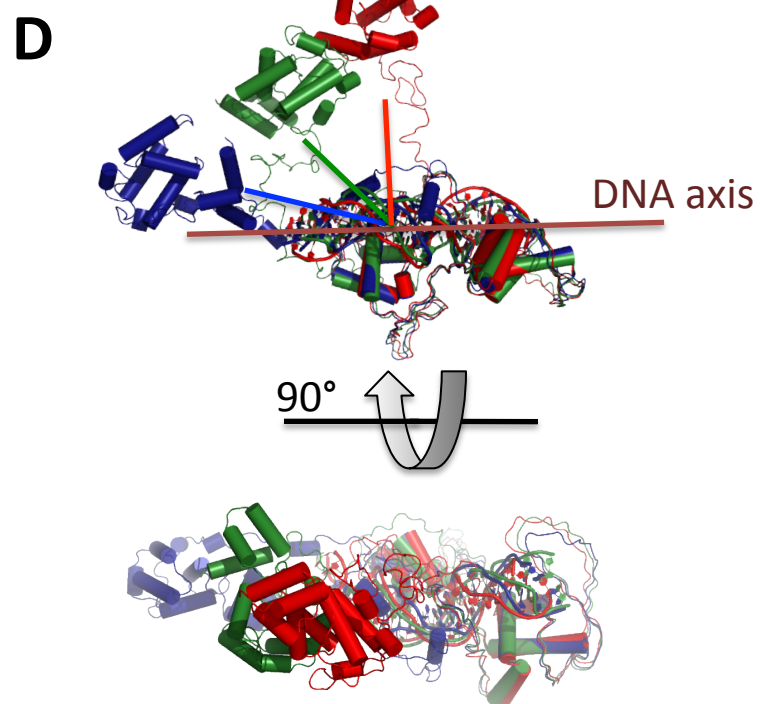

Figure S4 : **Rap1<sub>[358-827]</sub>** conformational adjustment

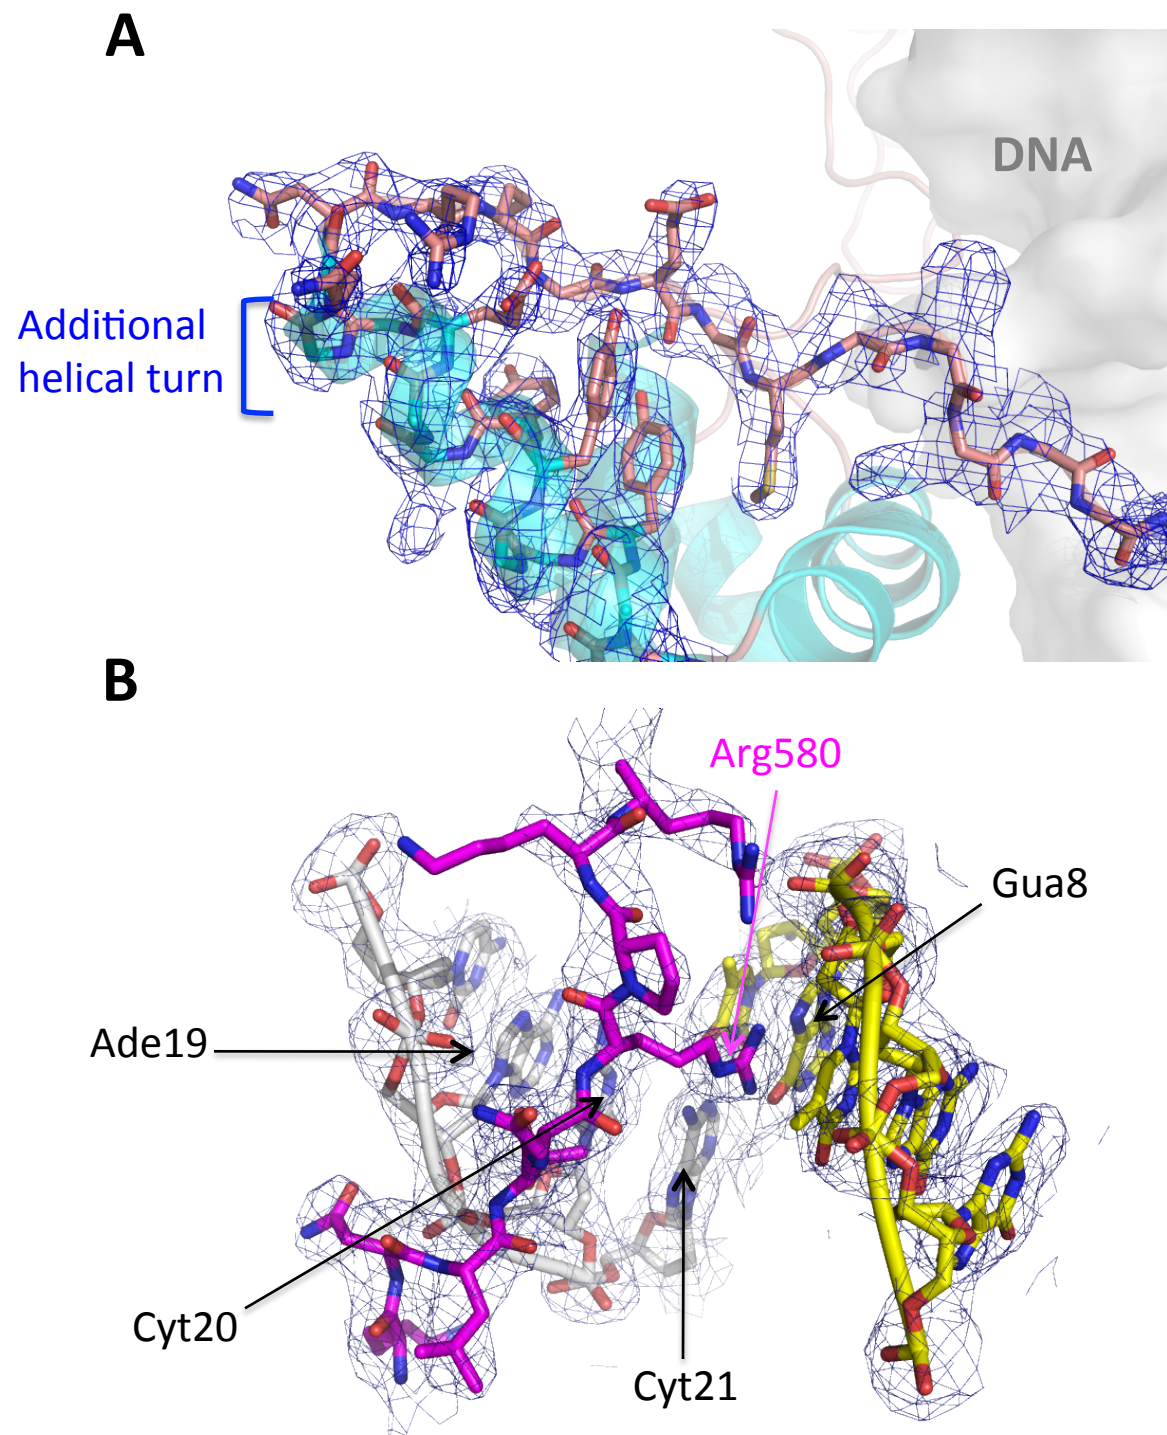

Figure S5: **Crystal structure of Rap1<sub>DBD</sub>/DNA**

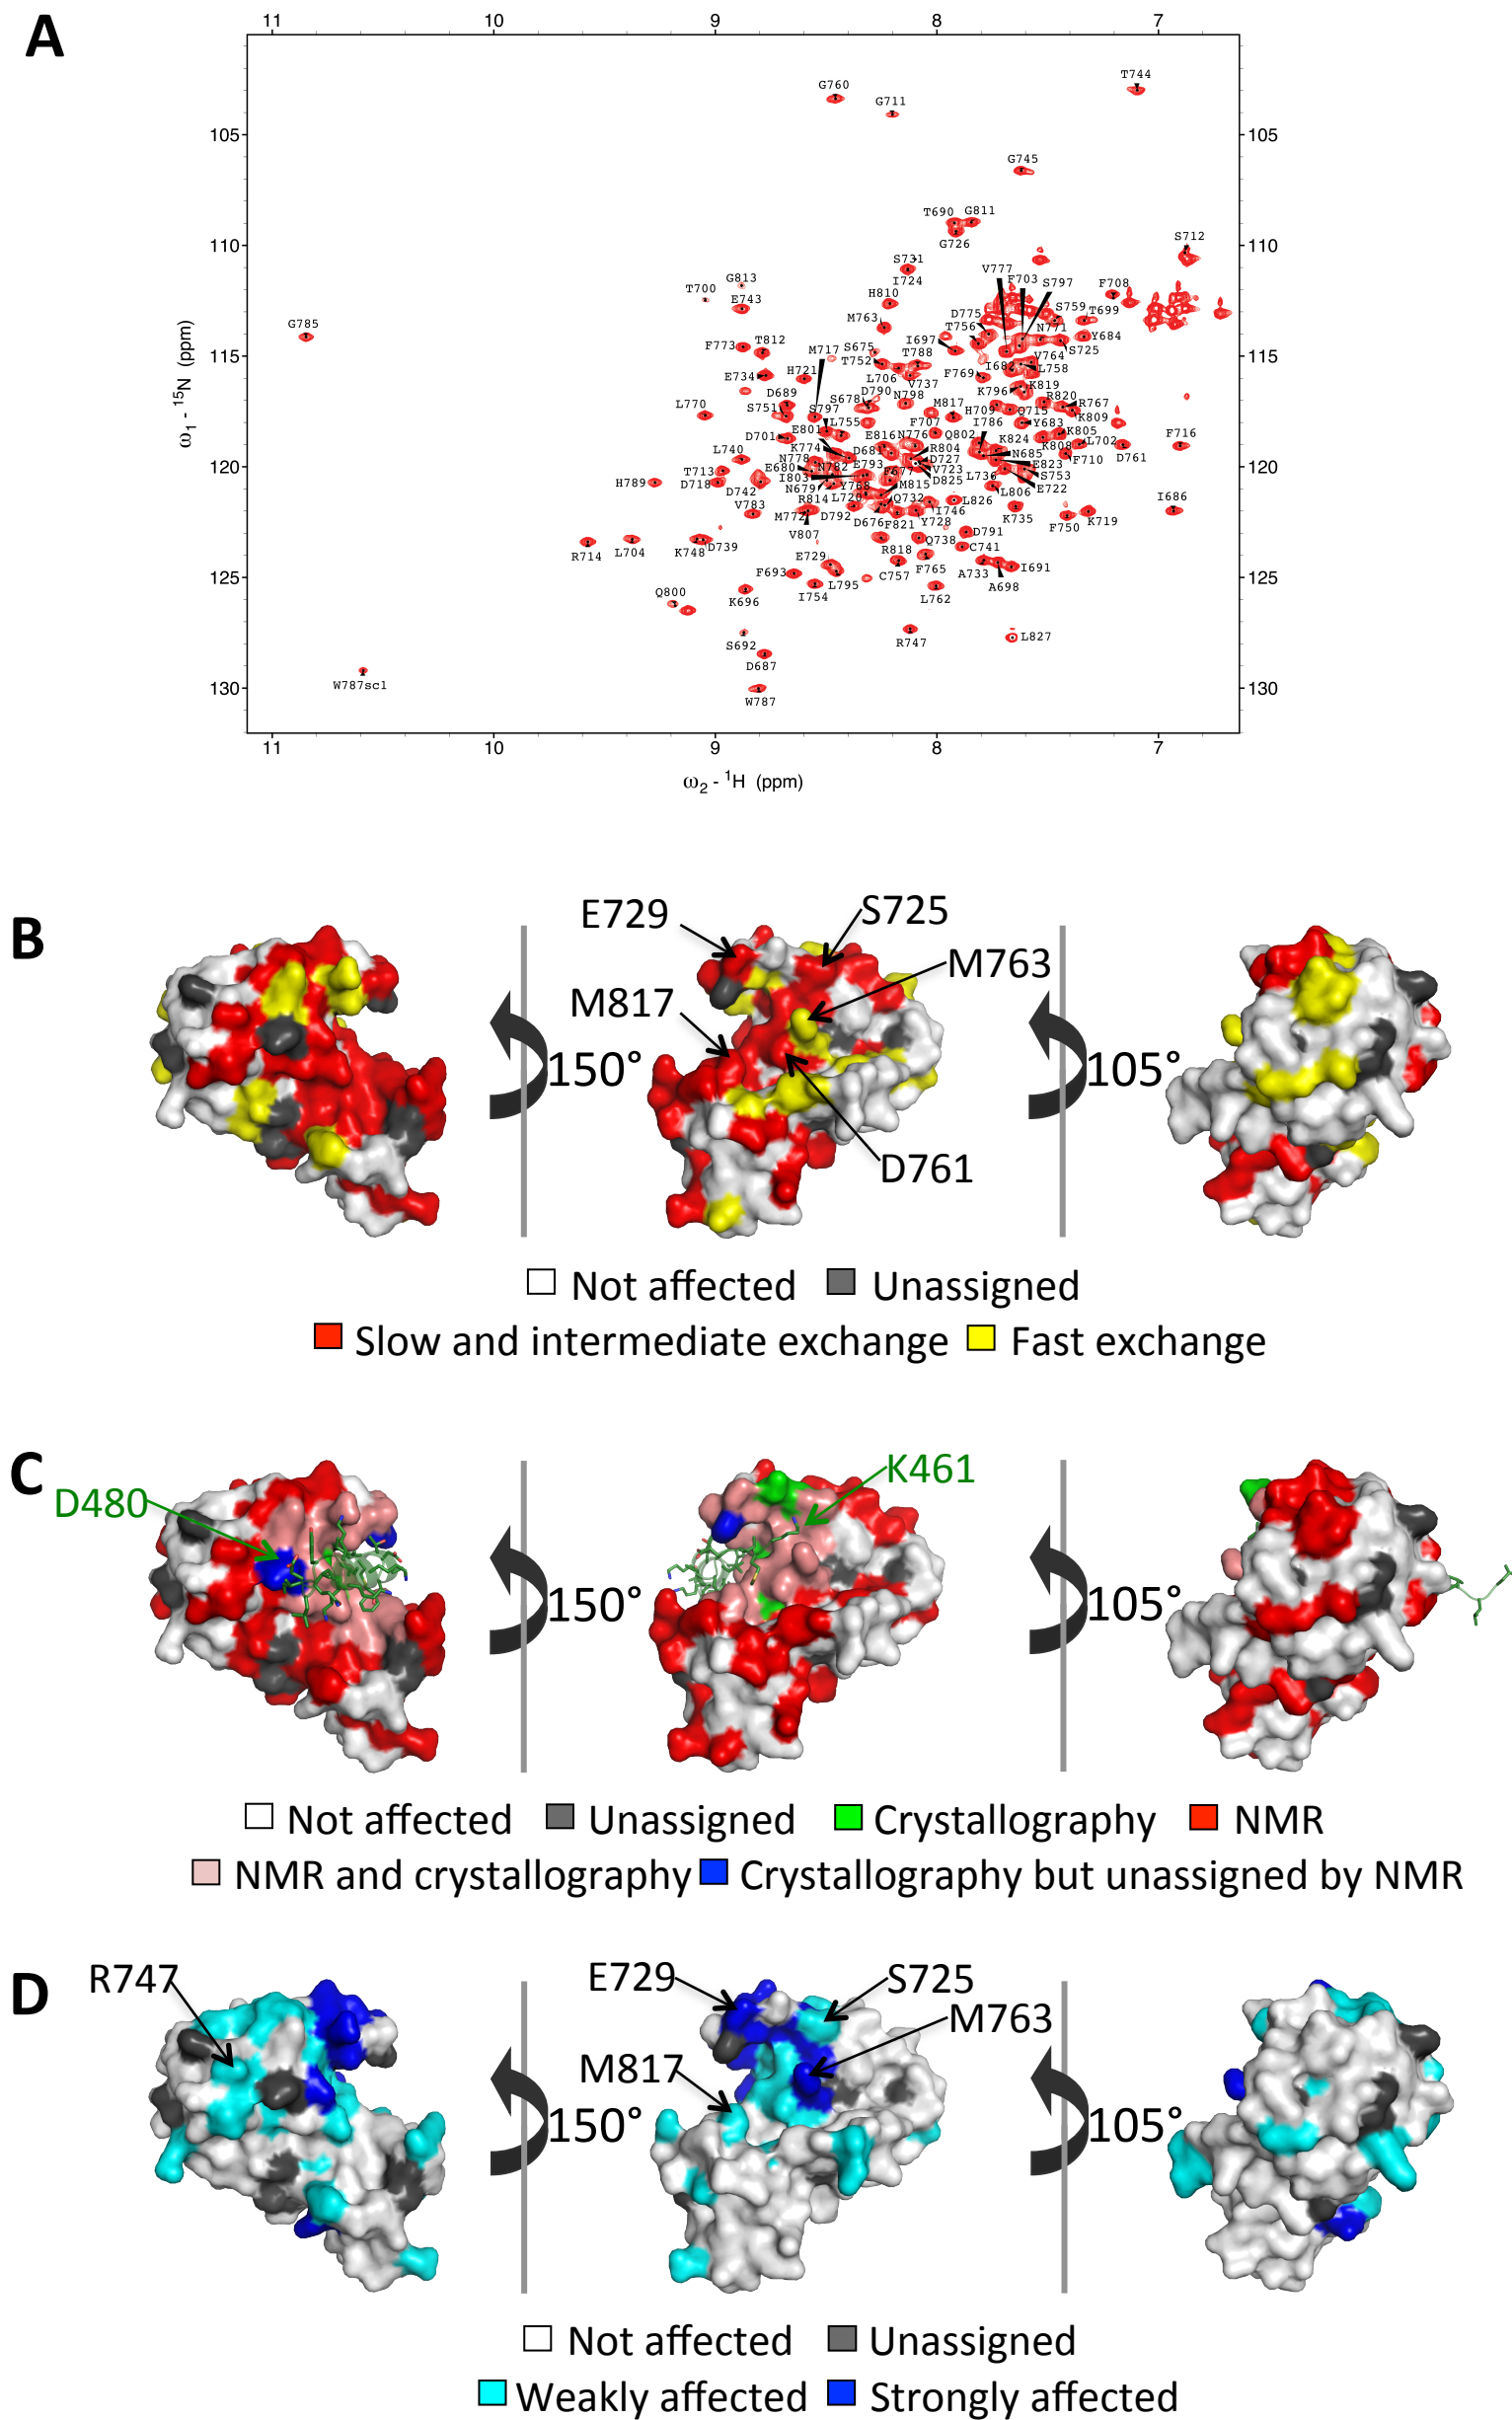

Figure S6 : NMR titration

**A**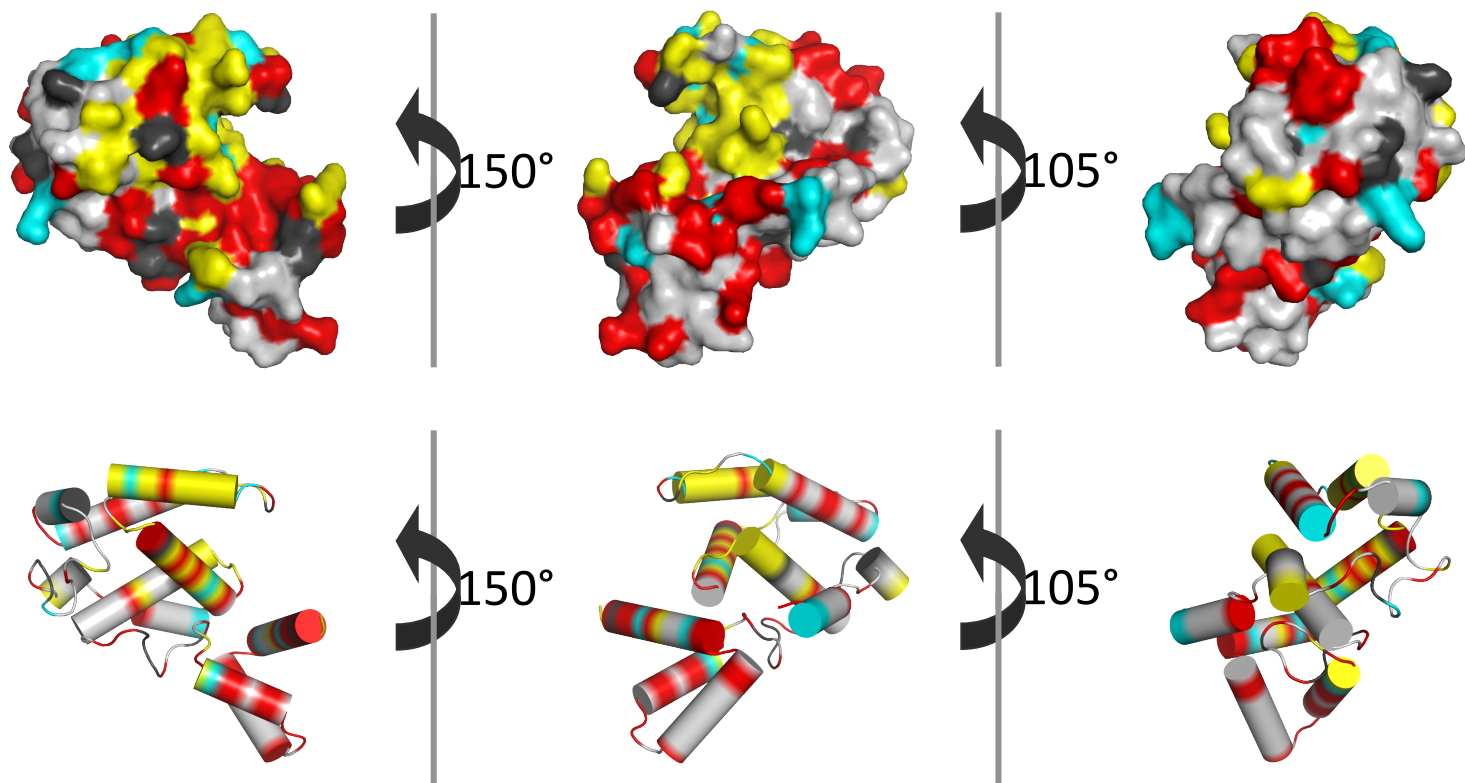

□ Not affected    ■ Unassigned    ■ Sir3  
■ Rif2    ■ Common to Sir3 and Rif2

**B**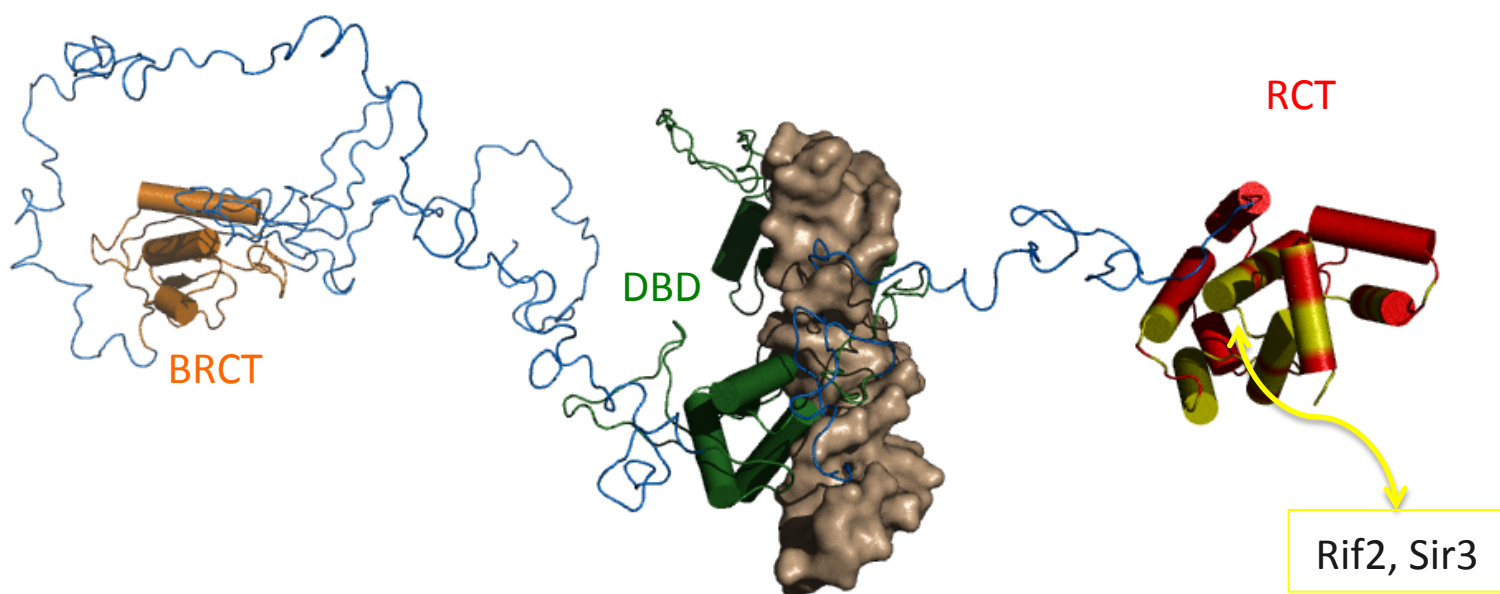

Figure S7: Interaction surface of Rap1 RCT domain with Rif2 and Sir3

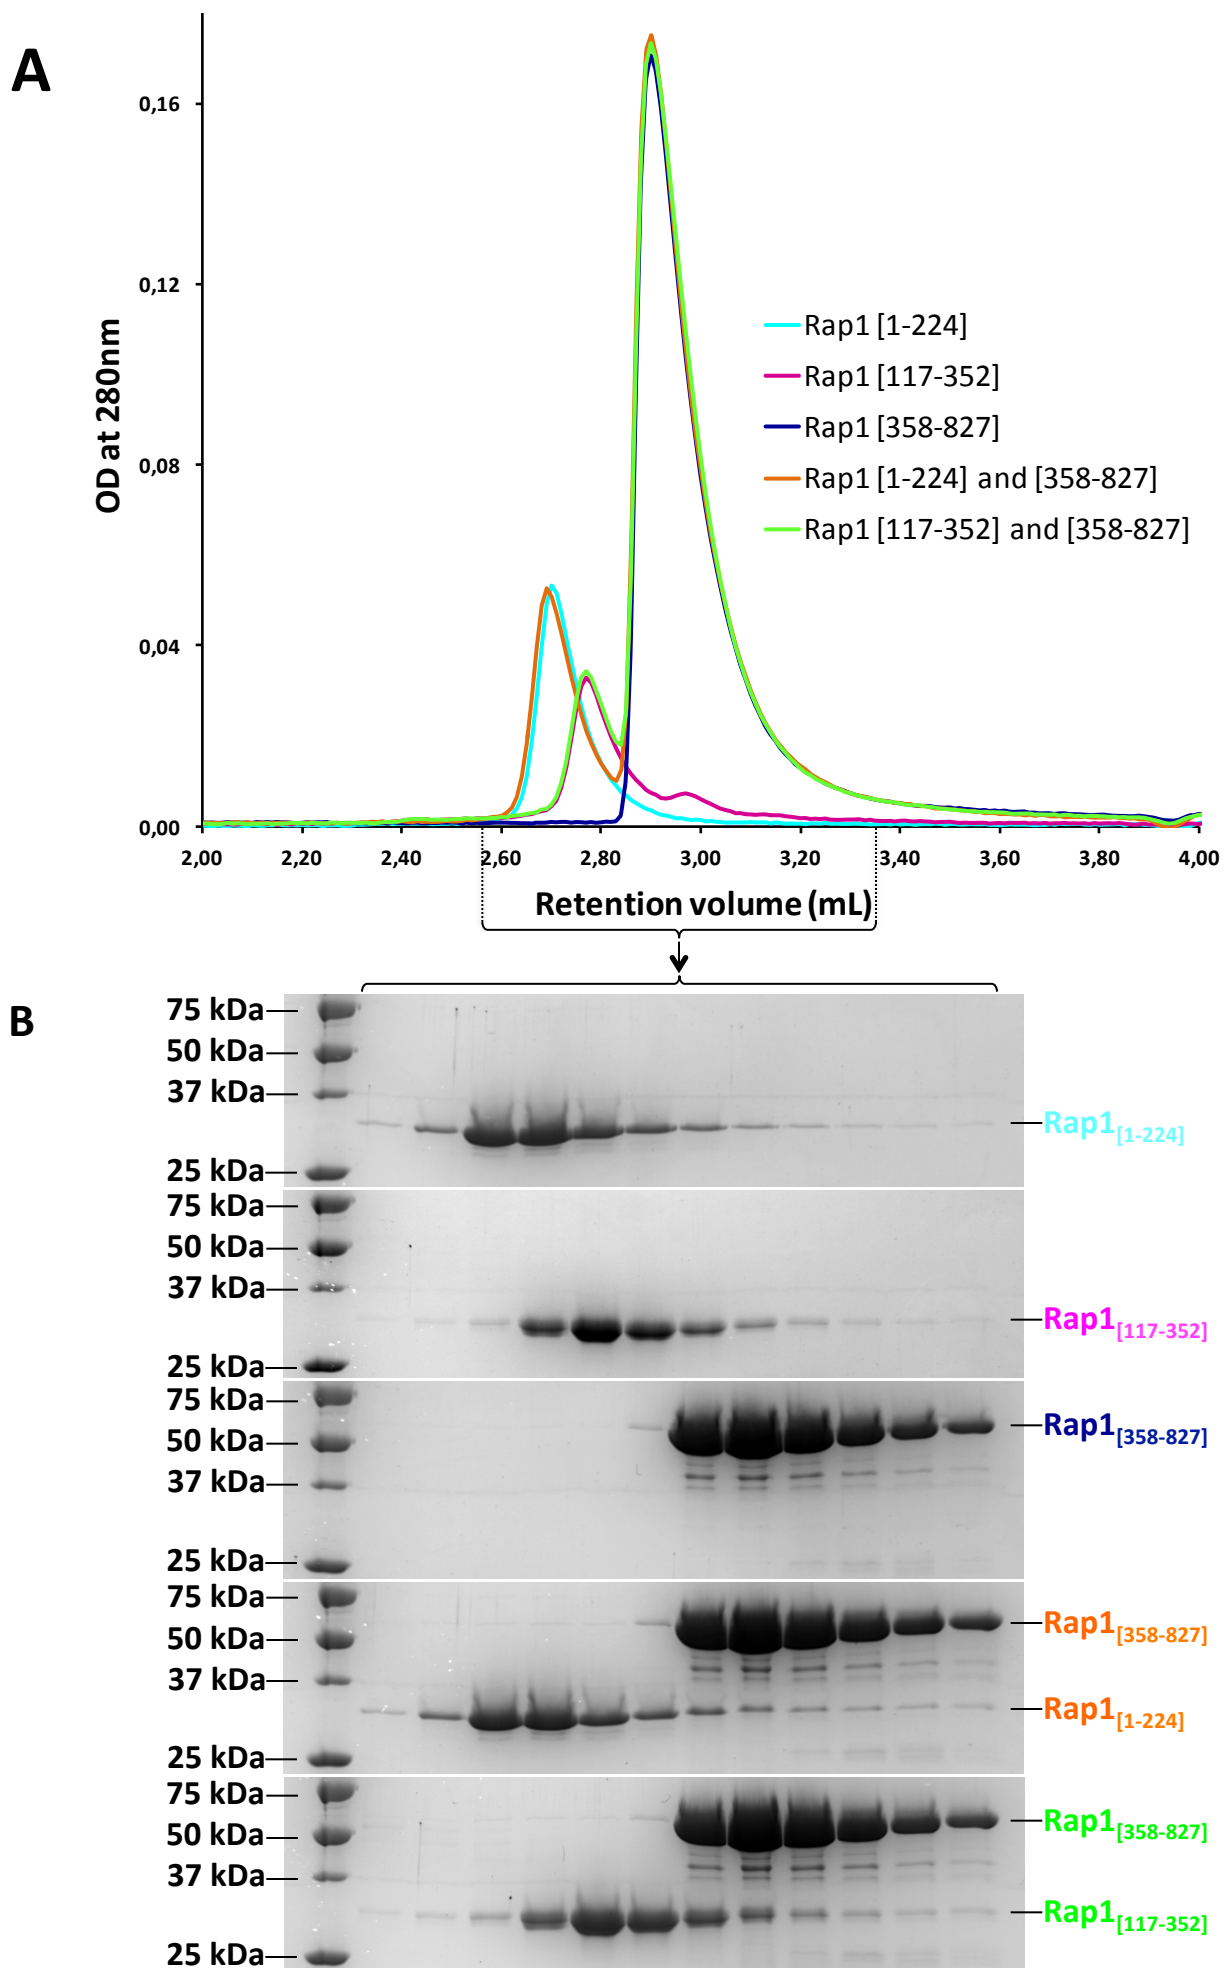

Figure S8: Interaction analysis between Rap1<sub>[358-827]</sub> and Rap1<sub>[1-224]</sub> or Rap1<sub>[117-352]</sub>.
